# Supplementary material
Source: ML conference proceedings conference paper supplement (https://openaccess.thecvf.com/content/CVPR2024/html/Kim_LAN_Learning_to_CVPR_2024_paper.html)
Supplement: Supplementary file 1 [file Kim_LAN_Learning_to_CVPR_2024_supplemental.pdf]

# LAN: Learning to Adapt Noise for Image Denoising

## Supplementary Material

| Model     | Dataset | Self-loss | PSNR <sup>†</sup> (dB) |              |
|-----------|---------|-----------|------------------------|--------------|
|           |         |           | Full-train             | LAN (Ours)   |
| Restormer | PolyU   | ZS-N2N    | 39.06                  | <b>39.20</b> |
|           |         | Nbr2Nbr   | 38.77                  | <b>39.11</b> |
|           | Nam     | ZS-N2N    | 38.40                  | <b>38.84</b> |
|           |         | Nbr2Nbr   | 37.83                  | <b>38.49</b> |
| Uformer   | PolyU   | ZS-N2N    | 38.38                  | <b>39.05</b> |
|           |         | Nbr2Nbr   | 38.48                  | <b>39.09</b> |
|           | Nam     | ZS-N2N    | 37.80                  | <b>38.37</b> |
|           |         | Nbr2Nbr   | 37.23                  | <b>38.19</b> |

Table S1. PSNR comparison for Restormer and Uformer on the PolyU and Nam dataset with 40 iterations.

| Model     | Dataset | Self-loss | SSIM <sup>†</sup> |              |
|-----------|---------|-----------|-------------------|--------------|
|           |         |           | Full-train        | LAN (Ours)   |
| Restormer | PolyU   | ZS-N2N    | 0.963             | <b>0.968</b> |
|           |         | Nbr2Nbr   | 0.960             | <b>0.969</b> |
|           | Nam     | ZS-N2N    | 0.950             | <b>0.965</b> |
|           |         | Nbr2Nbr   | 0.942             | <b>0.962</b> |
| Uformer   | PolyU   | ZS-N2N    | 0.953             | <b>0.966</b> |
|           |         | Nbr2Nbr   | 0.957             | <b>0.968</b> |
|           | Nam     | ZS-N2N    | 0.941             | <b>0.965</b> |
|           |         | Nbr2Nbr   | 0.931             | <b>0.960</b> |

Table S2. SSIM comparison for Restormer and Uformer on the PolyU and Nam dataset with 40 iterations.

### S1. Additional quantitative results

To evaluate the effectiveness of our proposed framework LAN, we compare it to alternative adaptation methods. To demonstrate the applicability of our framework, we also conducted experiments with different network backbones, namely DnCNN [48], Restormer [47], Uformer [41], with different self-supervised losses such as ZS-N2N [34] and Nbr2Nbr [17]. In particular for Restormer and Uformer, in order to verify the performance differences when the main compared method, Full-trainable, and our LAN reach their respective peaks, we performed a performance comparison at 40 iterations for both models instead of the original 20 iterations as Figure S1 and Figure S2. Comparing the peak PSNR and SSIM performance in each experimental case as shown in Table S1 and Table S2, our method shows higher performance.

### S2. Additional qualitative results

We show additional qualitative results of the pre-train networks, the 'full-trainable' adaptation, and our LAN framework in Figure S3. These images were obtained with Restormer fine-tuned via N2N with 20 iterations on the Nam dataset and fine-tuned via ZS-N2N with 20 iterations on the PolyU dataset. Similar to Uformer's results presented in the previous qualitative results, our method significantly

removes unseen noise compared to the pre-trained network and 'full-trainable' adaptation.

### S3. Efficiency differences as input size changes

As we discussed in Section 4.2, our proposed method, LAN, assumes a 256 x 256 image size, and we verified its time and space efficiency using Restormer and Uformer. In this section, we discuss the changes in time and space efficiency as the input image size changes. In total, we conducted experiments for image sizes ranging from 64 to 512. The comparison between 64 and 256 image sizes is performed using the Restormer. This is because the minimum image size for the Uformer model with the subsampling-based self-loss method is 256. The comparison between 256 and 512 image sizes is performed using the Uformer. This is because Restormer had a problem with exceeding memory when used with ZS-N2N at 512 image size.

### S4. LAN-black-box (LAN-BB)

Our LAN framework also works for scenarios where a denoising network is not directly available to us, where we only have access to the prediction by a given denoising network. Thus, we take a denoising network as a black box when performing noise adaptation. We call this version LAN-black-box (LAN-BB). In this case, we perform the adaptation using only the prediction results, without using the gradient from the denoising network. To achieve this, our implementation uses the stop-gradient operation. Thus, noise adaptation is performed as follows:

$$\phi^* = \arg \min_{\phi} \left\| \text{sg}[f_{\theta^*}(D_1(\mathbf{y}^u + \phi))] - D_2(\mathbf{y}^u + \phi) \right\|_2^2, \quad (\text{S1})$$

where  $\text{sg}[\cdot]$  denotes stop-gradient operation.

This approach allows us to effectively adapt to unseen noise without backpropagation through a denoising network. Removing the backpropagation process for the denoising network results in the significant improvement in efficiency, as shown in Table S5. Meanwhile, in contrast to expectation that the denoising performance may be degraded, Table S3 shows that there is not much performance degradation. One possible explanation would be that the network prediction (an estimated clean image) reveals the misalignment between the unseen noise from input image and noise a network expects. Furthermore, the training of our learnable offset  $\phi$  can be still achieved with gradients computed from the term  $D_2(\mathbf{y}^u + \phi)$  in the self-supervised loss function (Equation S1).

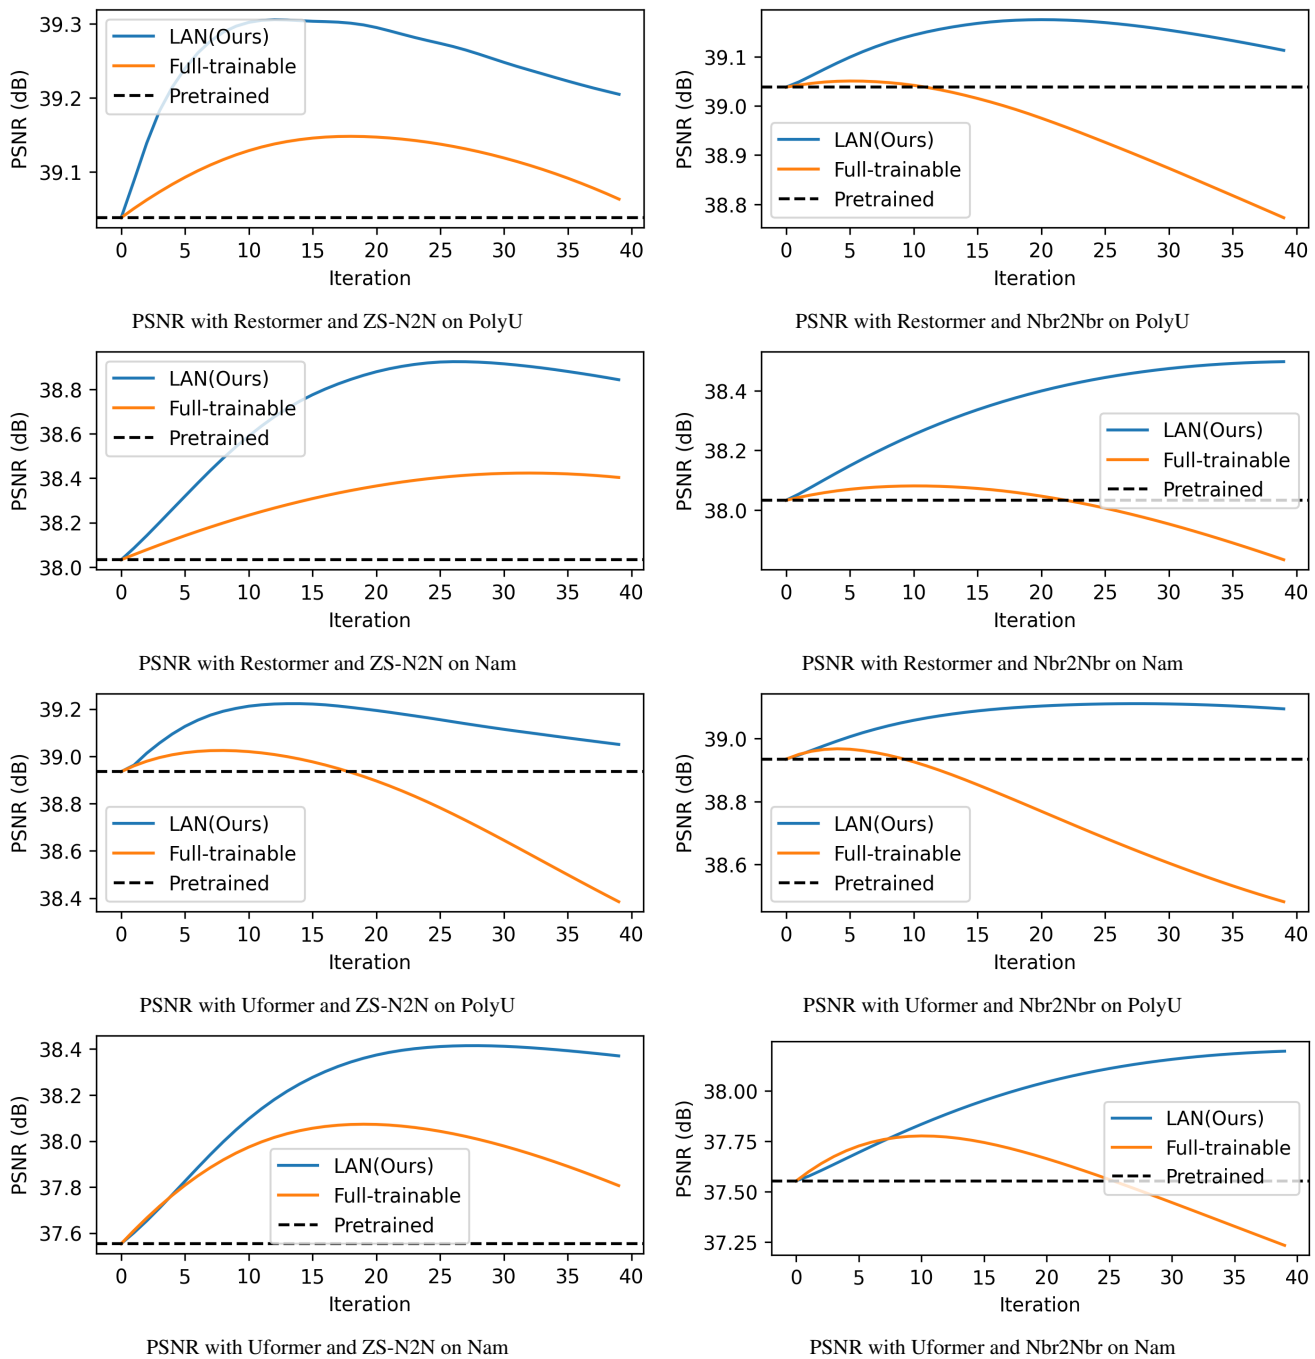

Figure S1. PSNR comparison for Restormer and Uformer on the PolyU and Nam dataset. Iteration increased from 20 to 40

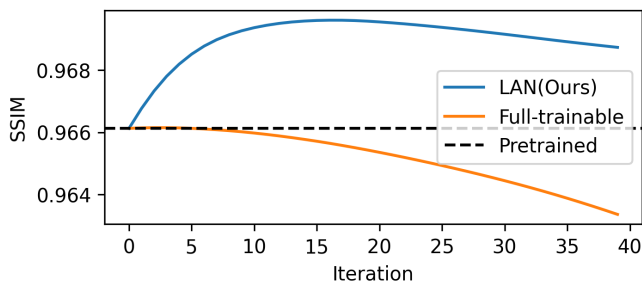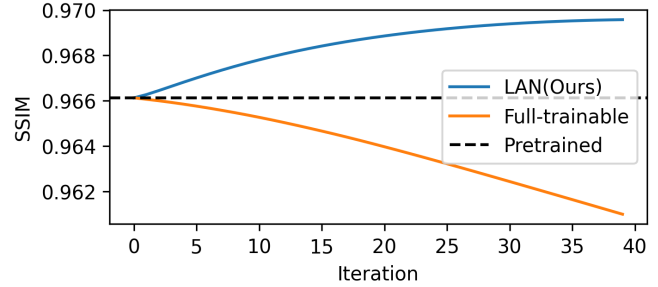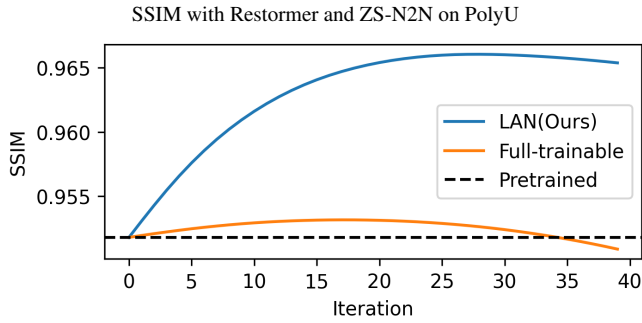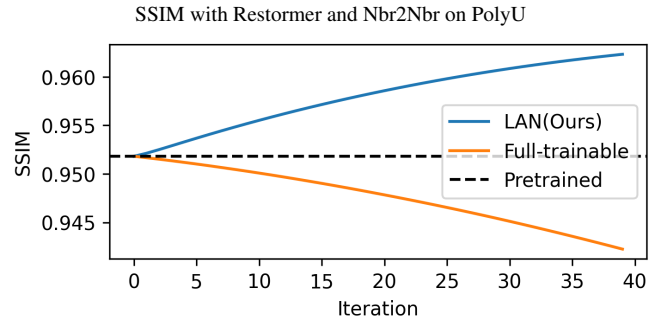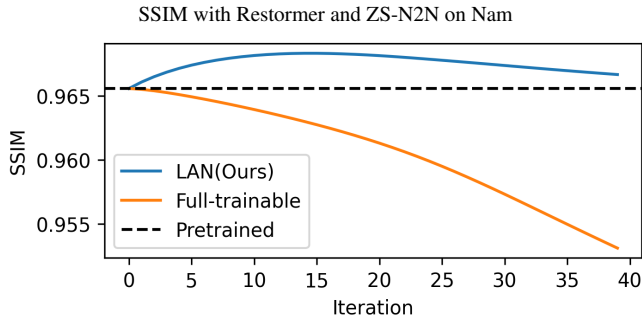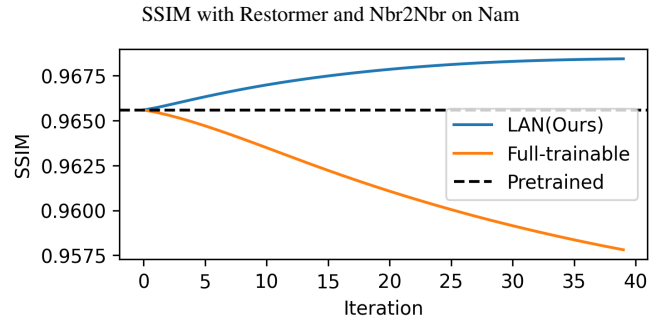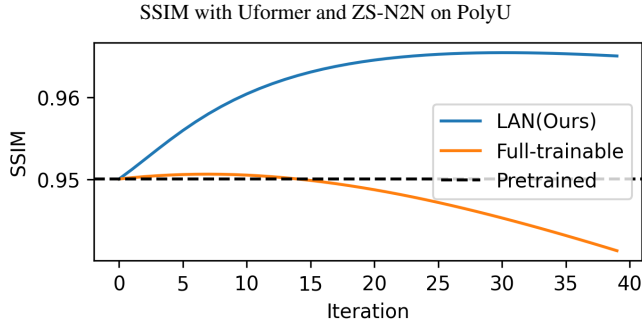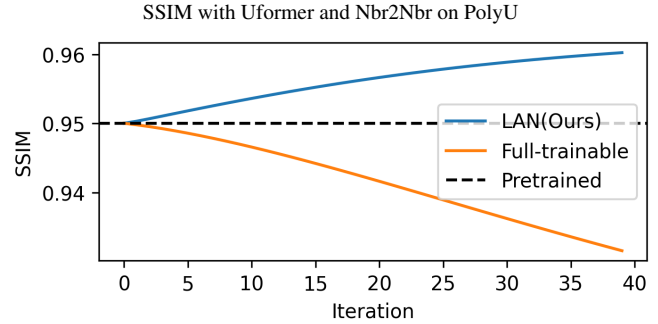

Figure S2. SSIM comparison for Restormer and Uformer on the PolyU and Nam dataset. Iteration increased from 20 to 40

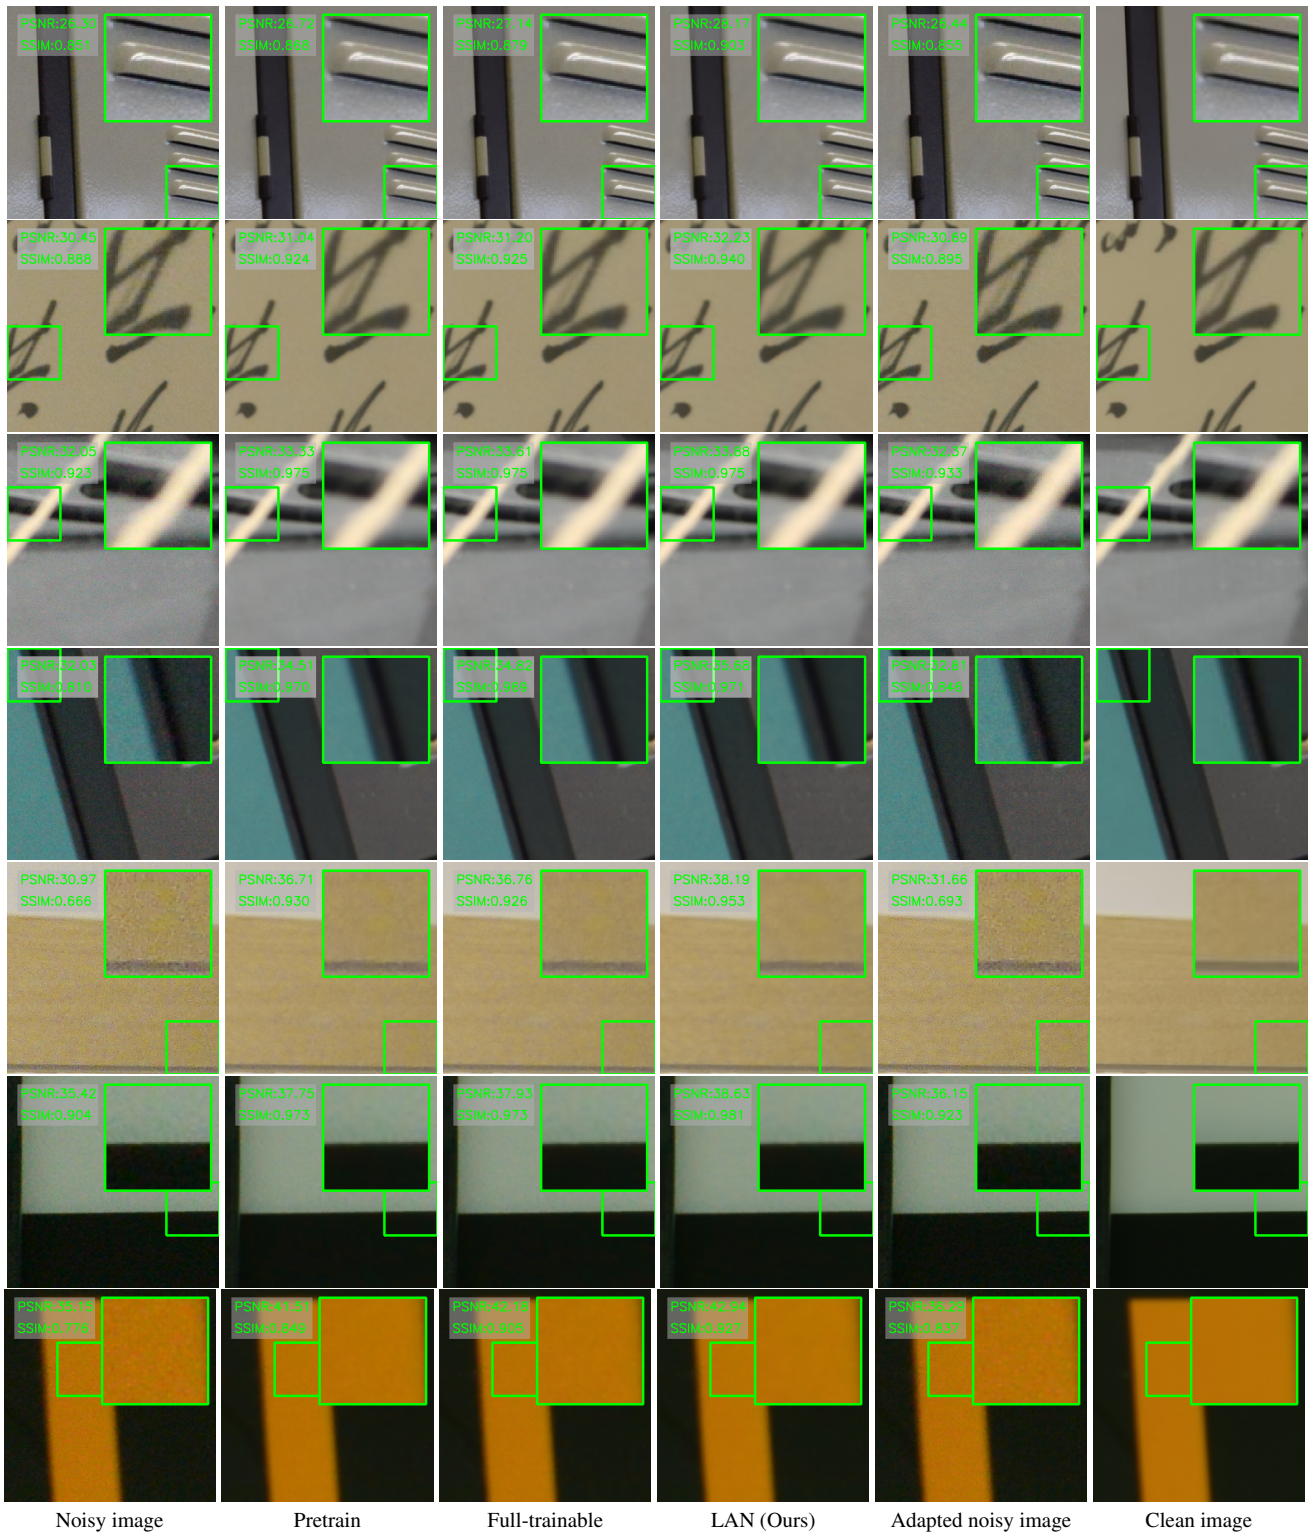

Figure S3. Qualitative comparisons among different adaptation methods. Images are obtained with SIDD-pretrained Restormer. Full-trainable and LAN (Ours) finetuned the pretrained network for 20 iterations on PolyU via ZS-N2N (first five rows) and on Nam via Nbr2Nbr (last two rows).



| Model          | Method         | Iter.      | SIDD $\rightarrow$ PolyU               |                      | SIDD $\rightarrow$ Nam                 |                      |
|----------------|----------------|------------|----------------------------------------|----------------------|----------------------------------------|----------------------|
|                |                |            | PSNR $\uparrow$ (dB) / SSIM $\uparrow$ |                      | PSNR $\uparrow$ (dB) / SSIM $\uparrow$ |                      |
|                |                |            | ZS-N2N                                 | Nbr2Nbr              | ZS-N2N                                 | Nbr2Nbr              |
| DnCNN          | pretrained     | -          | 38.10 / 0.952                          |                      | 36.60 / 0.930                          |                      |
|                |                | 5          | 38.07 / 0.951                          | 38.08 / 0.951        | 36.60 / 0.929                          | 36.60 / 0.929        |
|                | full-trainable | 10         | 38.04 / 0.950                          | 38.06 / 0.951        | 36.59 / 0.928                          | 36.60 / 0.928        |
|                |                | 20         | 37.99 / 0.949                          | 38.02 / 0.949        | 36.56 / 0.925                          | 36.56 / 0.925        |
|                | LAN            | 5          | 38.22 / 0.954                          | 38.16 / 0.953        | 36.73 / 0.934                          | 36.66 / 0.932        |
|                |                | 10         | <b>38.29 / 0.955</b>                   | 38.22 / 0.954        | <b>36.79 / 0.936</b>                   | 36.71 / 0.933        |
|                |                | 20         | <b>38.29 / 0.955</b>                   | 38.31 / <b>0.956</b> | <b>36.78 / 0.938</b>                   | <b>36.80 / 0.935</b> |
|                |                | 5          | 38.23 / 0.954                          | 38.17 / 0.953        | 36.70 / 0.934                          | 36.66 / 0.932        |
|                | LAN-BB         | 10         | 38.27 / <b>0.955</b>                   | 38.25 / 0.955        | 36.73 / 0.936                          | 36.71 / 0.934        |
|                |                | 20         | 38.14 / 0.953                          | <b>38.34 / 0.956</b> | 36.59 / 0.937                          | 36.79 / <b>0.937</b> |
|                |                | 5          | 39.09 / 0.966                          | 39.04 / 0.965        | 38.14 / 0.952                          | 38.07 / 0.951        |
|                | Restormer      | pretrained | -                                      | 39.03 / 0.966        |                                        | 38.03 / 0.951        |
| 5              |                |            | 39.09 / 0.966                          | 39.04 / 0.965        | 38.14 / 0.952                          | 38.07 / 0.951        |
| full-trainable |                | 10         | 39.12 / 0.965                          | 39.04 / 0.965        | 38.23 / 0.952                          | 38.08 / 0.950        |
|                |                | 20         | 39.14 / 0.965                          | 38.98 / 0.964        | 38.35 / 0.953                          | 38.05 / 0.948        |
| LAN            |                | 5          | 39.23 / 0.968                          | 39.09 / 0.967        | 38.31 / 0.957                          | 38.14 / 0.953        |
|                |                | 10         | 39.30 / <b>0.969</b>                   | 39.14 / 0.967        | 38.58 / 0.961                          | 38.25 / 0.955        |
|                |                | 20         | 39.28 / <b>0.969</b>                   | 39.17 / 0.968        | <b>38.86 / 0.965</b>                   | 38.38 / 0.958        |
|                |                | 5          | 39.24 / 0.968                          | 39.13 / 0.967        | 38.36 / 0.957                          | 38.16 / 0.954        |
| LAN-BB         |                | 10         | <b>39.33 / 0.969</b>                   | 39.22 / 0.968        | 38.55 / 0.961                          | 38.30 / 0.956        |
|                |                | 20         | 39.19 / 0.968                          | <b>39.33 / 0.969</b> | 38.53 / <b>0.966</b>                   | <b>38.50 / 0.961</b> |
|                |                | 5          | 39.01 / 0.964                          | 38.96 / 0.964        | 37.80 / 0.950                          | 37.72 / 0.948        |
| Uformer        |                | pretrained | -                                      | 38.93 / 0.965        |                                        | 37.55 / 0.950        |
|                | 5              |            | 39.01 / 0.964                          | 38.96 / 0.964        | 37.80 / 0.950                          | 37.72 / 0.948        |
|                | full-trainable | 10         | 39.01 / 0.963                          | 38.92 / 0.963        | 37.97 / 0.950                          | 37.77 / 0.946        |
|                |                | 20         | 38.91 / 0.961                          | 38.77 / 0.961        | 38.07 / 0.948                          | 37.67 / 0.942        |
|                | LAN            | 5          | 39.12 / 0.967                          | 39.00 / 0.966        | 37.82 / 0.955                          | 37.69 / 0.951        |
|                |                | 10         | <b>39.21 / 0.968</b>                   | 39.05 / 0.966        | 38.09 / 0.960                          | 37.83 / 0.953        |
|                |                | 20         | 39.20 / <b>0.968</b>                   | 39.10 / 0.967        | <b>38.36 / 0.964</b>                   | 38.02 / 0.956        |
|                |                | 5          | 39.13 / 0.967                          | 39.01 / 0.966        | 37.89 / 0.955                          | 37.68 / 0.952        |
|                | LAN-BB         | 10         | 39.20 / <b>0.968</b>                   | 39.09 / 0.967        | 38.13 / 0.959                          | 37.83 / 0.954        |
|                |                | 20         | 38.95 / 0.966                          | <b>39.16 / 0.968</b> | 38.21 / <b>0.964</b>                   | <b>38.07 / 0.958</b> |

Table S3. **Quantitative comparison of denoising performance** for each combination of denoising network backbone, adaptation method of full-train, LAN and LAN-BB, and self-supervised loss on real-world noise datasets (PolyU and Nam) after pre-training on another real noise dataset, SIDD.

| Model     | Input size | Self-loss | LAN / Full-trainable |         |
|-----------|------------|-----------|----------------------|---------|
|           |            |           | Time                 | Memory  |
| Restormer | 64         | ZS-N2N    | 87.17 %              | 87.82 % |
|           |            | Nbr2Nbr   | 88.79 %              | 79.06 % |
|           | 128        | ZS-N2N    | 87.69 %              | 91.85 % |
|           |            | Nbr2Nbr   | 87.86 %              | 86.98 % |
|           | 256        | ZS-N2N    | 79.88 %              | 93.27 % |
|           |            | Nbr2Nbr   | 93.04 %              | 92.22 % |
| Uformer   | 256        | ZS-N2N    | 74.10 %              | 73.75 % |
|           |            | Nbr2Nbr   | 85.24 %              | 74.21 % |
|           | 512        | ZS-N2N    | 74.72 %              | 75.06 % |
|           |            | Nbr2Nbr   | 90.98 %              | 80.17 % |

Table S4. The runtime and memory efficiency ratio of LAN (ours) to full-trainable on various input image size.

| Model     | Self-loss | LAN-BB/Full-trainable |         |
|-----------|-----------|-----------------------|---------|
|           |           | Time                  | Memory  |
| Restormer | ZS-N2N    | 26.77 %               | 3.81 %  |
|           | Nbr2Nbr   | 75.34 %               | 18.75 % |
| Uformer   | ZS-N2N    | 42.51 %               | 14.00 % |
|           | Nbr2Nbr   | 74.29 %               | 49.80 % |
| Model     | Self-loss | LAN-BB/LAN            |         |
|           |           | Time                  | Memory  |
| Restormer | ZS-N2N    | 33.51 %               | 4.09 %  |
|           | Nbr2Nbr   | 75.86 %               | 20.36 % |
| Uformer   | ZS-N2N    | 57.37 %               | 18.98 % |
|           | Nbr2Nbr   | 78.50 %               | 67.44 % |

Table S5. The runtime and memory efficiency ratio of LAN-BB to full-trainable. And the runtime and memory efficiency ratio of LAN-BB to LAN. Each comparison is based on an image size of 256x256.
